# Supplementary material for: Crystal structure of a thermophilic fungal cyanase and its implications on the catalytic mechanism for bioremediation
Source: PubMed Central journal article supplement (PMC7801690; doi:10.1038/s41598-020-79489-3), 2021-01-11
Supplement: 41598_2020_79489_MOESM1_ESM.pdf [file 41598_2020_79489_MOESM1_ESM.pdf]

## **Supplementary Information**

### **Crystal structure of a thermophilic fungal cyanase and its implications on the catalytic mechanism for bioremediation**

Bibhuti Ranjan<sup>1,2</sup>, Philip H. Choi<sup>2</sup>, Santhosh Pillai<sup>1</sup>, Kugenthiren Permaul<sup>1</sup>, Liang Tong<sup>1,2\*</sup> & Suren Singh<sup>1\*</sup>

<sup>1</sup>Department of Biotechnology and Food Technology  
Faculty of Applied Sciences  
Durban University of Technology  
Durban-4000, South Africa

<sup>2</sup>Department of Biological Sciences  
Columbia University  
New York, NY 10027, USA

## Supplementary Figures

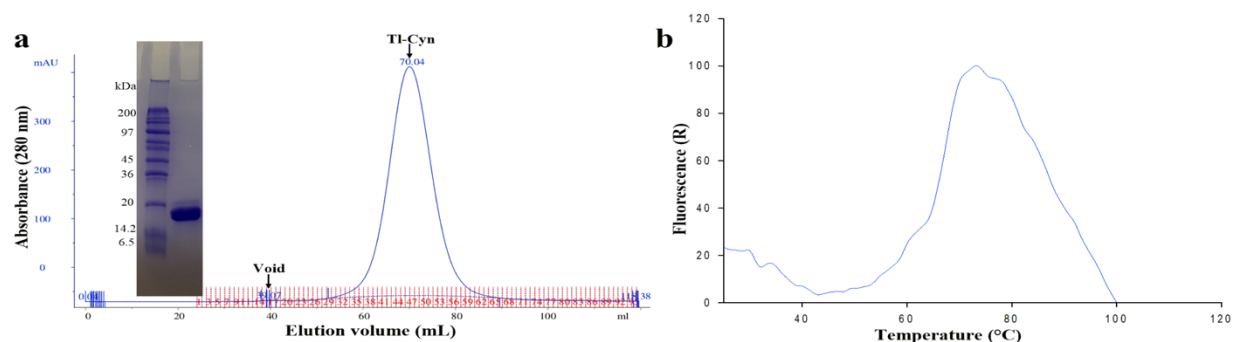

**Supplementary Figure 1. Purification and thermal unfolding analysis of TI-Cyn. a,** Gel filtration chromatogram of the purified TI-Cyn. Inset depicts SDS-PAGE image of a purified TI-Cyn. **b,** Thermal shift assay to examine the thermostability of TI-Cyn.

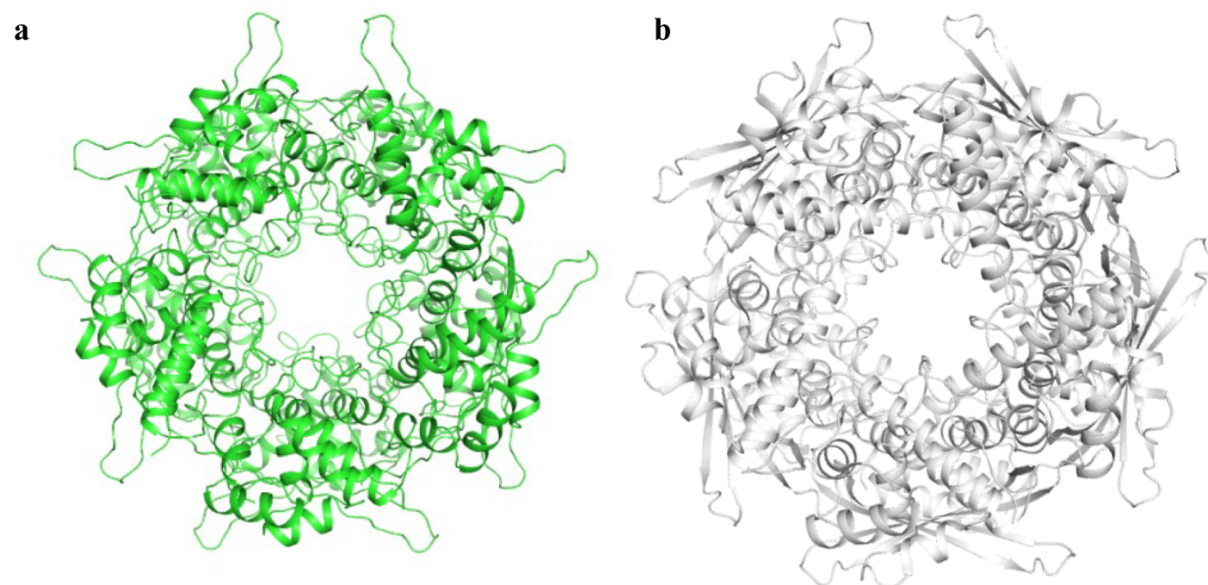

**Supplementary Figure 2. Overall appearance of the two cyanase decamers. a** TI-Cyn. **b,** *E. coli*.

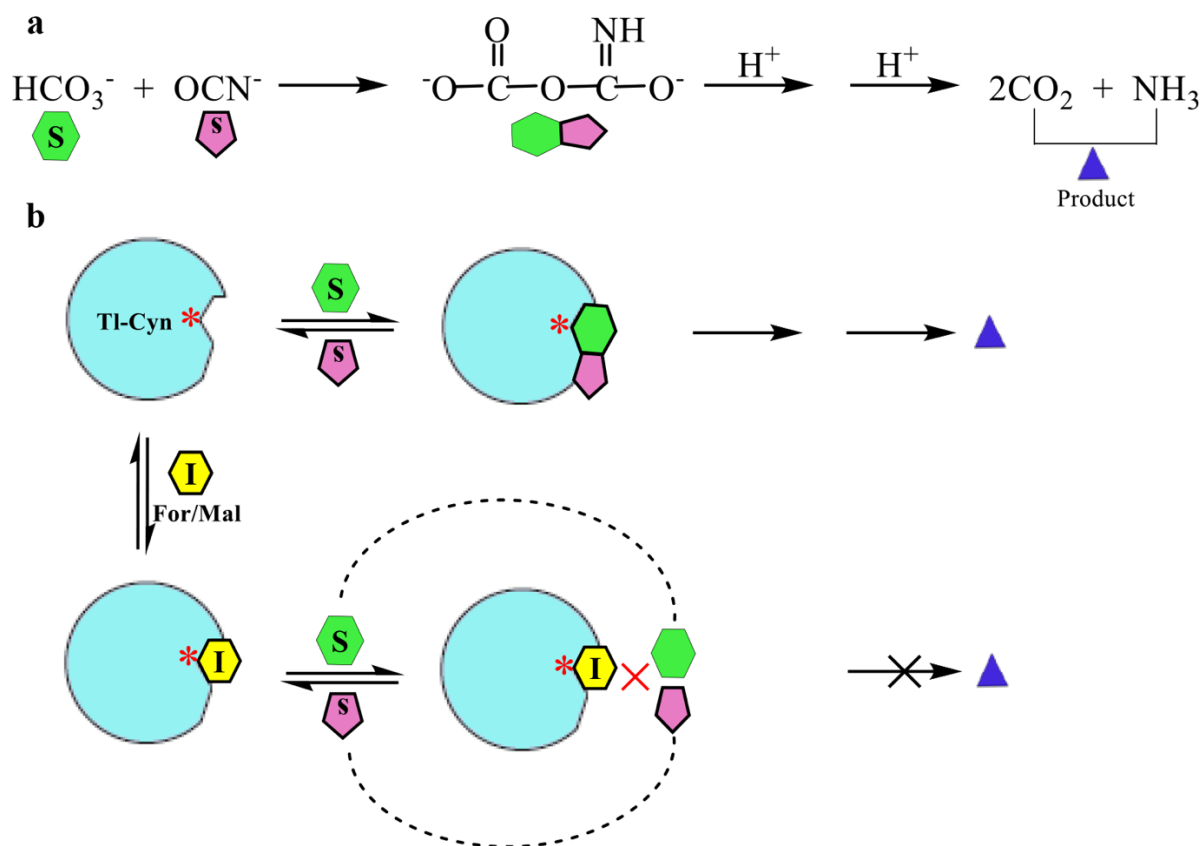

**Supplementary Figure 3. Possible mechanism of the TI-Cyn catalysis and inhibition. a,** Schematic drawing for the mechanism of cyanate decomposition catalyzed by cyanase. The substrates are shown with different colors and shapes, bicarbonate green hexagon, and cyanate purple pentagon. **b,** A cartoon representation for the catalysis and kinetic inhibition of the TI-Cyn. The active site is indicated with the red *asterisk*. The presence of the inhibitor at the active site of the TI-Cyn has hindered substrate binding. The substrates are given separate colors as in **a**. The inhibitor molecule is shown in yellow hexagon.

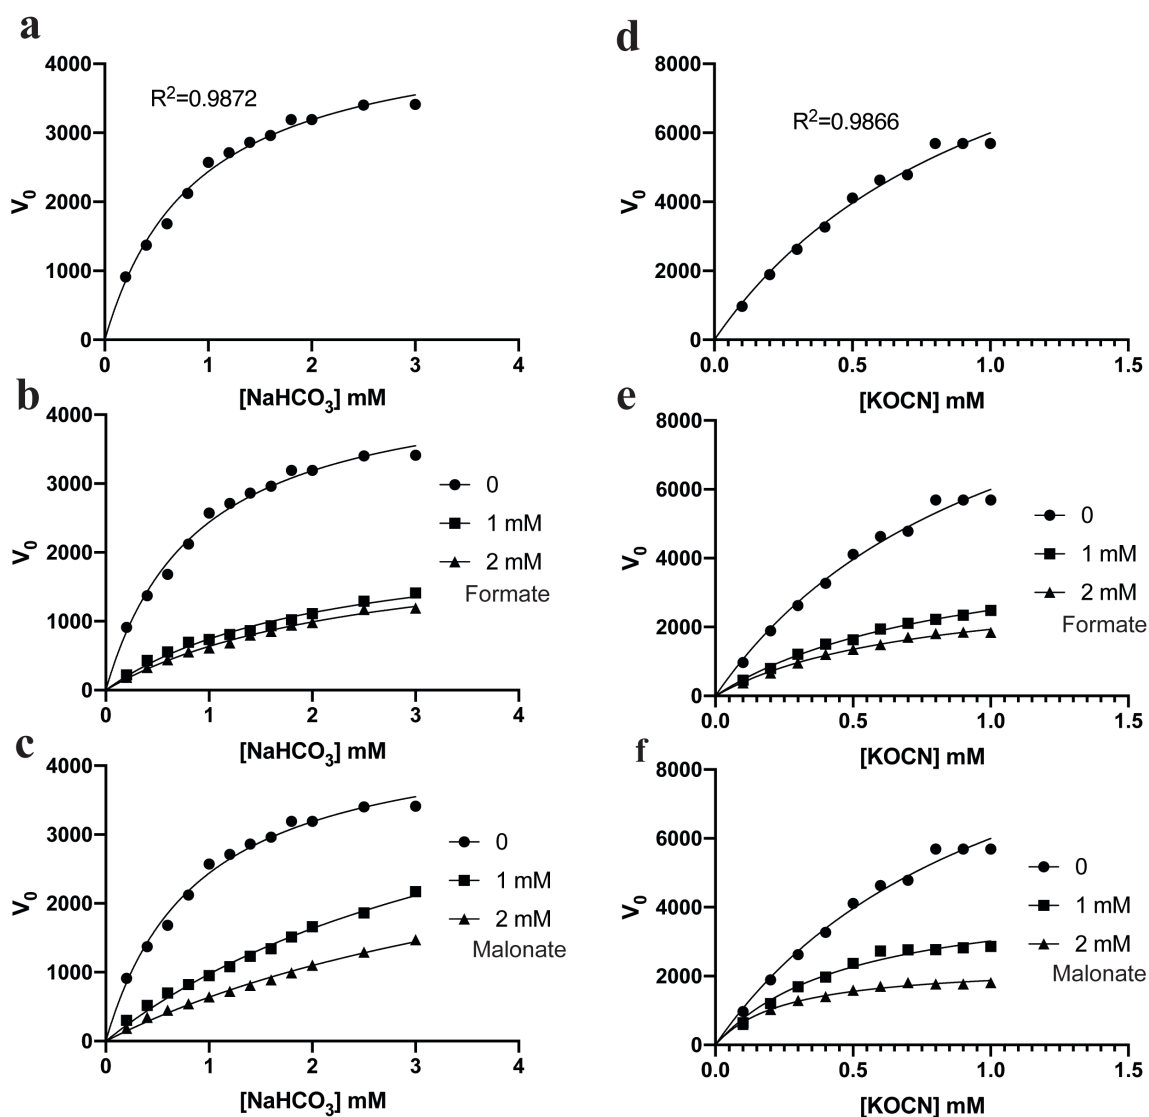

**Supplementary Figure 4. Kinetic studies on the inhibition of TI-Cyn by Non-linear curve-fitting using Michaelis-Menten plots.** **a**, Titration of  $\text{NaHCO}_3$ , while keeping  $\text{KOCN}$  constant in the absence of inhibitors. **b**, Titration of  $\text{NaHCO}_3$ , while keeping  $\text{KOCN}$  constant in the presence of inhibitor (Formate). **c**, Titration of  $\text{NaHCO}_3$ , while keeping  $\text{KOCN}$  constant in the presence of inhibitor (Malonate). **d**, Titration of  $\text{KOCN}$ , while keeping  $\text{NaHCO}_3$  constant in the absence of inhibitors. **e**, Titration of  $\text{KOCN}$ , while keeping  $\text{NaHCO}_3$  constant in the presence of inhibitor (Formate). **f**, Titration of  $\text{KOCN}$ , while keeping  $\text{NaHCO}_3$  constant in the presence of inhibitor (Malonate). The Non-linear curve-fittings and data prediction were performed using Prism 8 software.

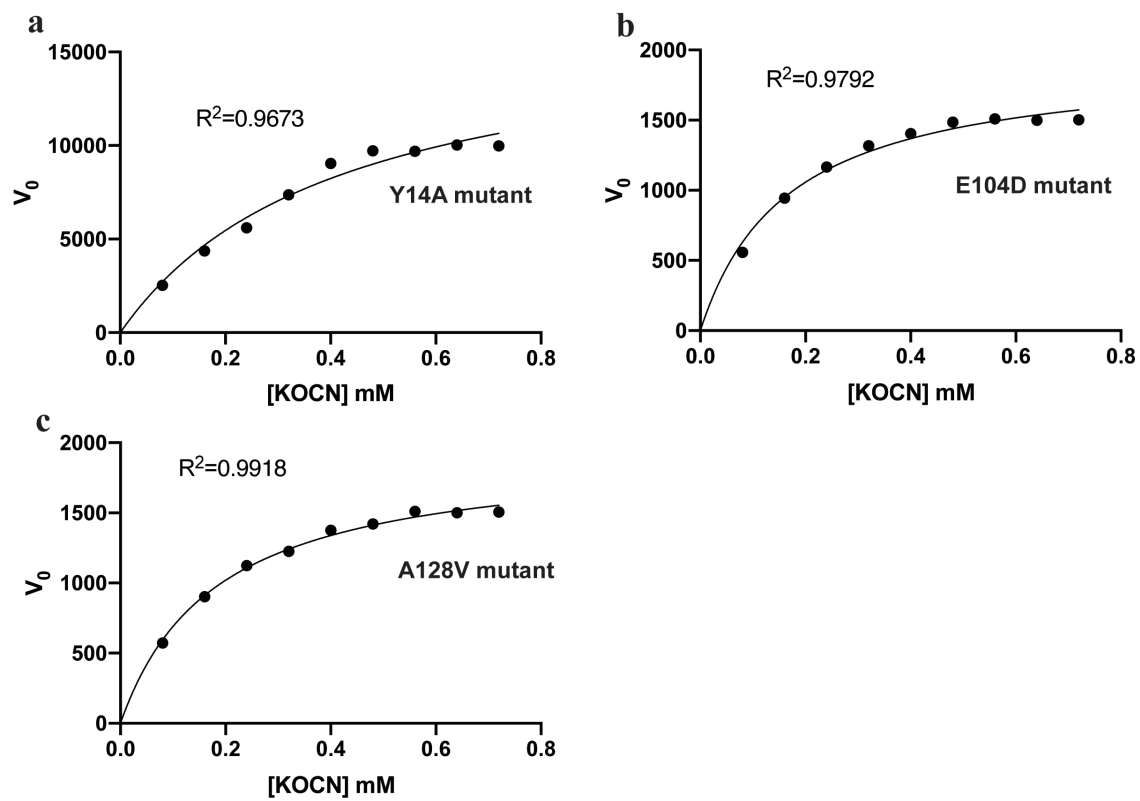

**Supplementary Figure 5. Kinetic studies of Tl-Cyn mutants by Non-linear curve-fitting using Michaelis-Menten plots. a,** Titration of KOCN, while keeping  $\text{NaHCO}_3$  constant for Y14A mutant. **b,** Titration of KOCN, while keeping  $\text{NaHCO}_3$  constant for E104D mutant. **c,** Titration of KOCN, while keeping  $\text{NaHCO}_3$  constant for A128V mutant.

## Supplementary Tables

**Supplementary Table 1.** Primer sequences for site directed mutagenesis

| Primer   | Sequence (5'→3')*                                             |
|----------|---------------------------------------------------------------|
| BRF_Y14  | GACGTC <del>ACT</del> CAGCATCCAG <b>GC</b> TCTACCCGCCTACTCCAA |
| BRR_Y14  | TTGGAGTAGGCGGGTAGAG <b>GC</b> TGGATGCTGAGTGACGTC              |
| BRF_R101 | AAGGAACCCTTGATTTAT <b>AA</b> ATTGTATGAGATTGTGCA               |
| BRR_R101 | TGCACAATCTCATAACAAT <b>TT</b> TATAAATCAAGGGTTCCTT             |
| BRF_E104 | GATTTATCGATTGTATGAC <b>CA</b> TTGTGCAGAATTATGGA               |
| BRR_E104 | TCCATAATTCTGCACAAT <b>GT</b> CATAACAATCGATAAATC               |
| BRF_S127 | TCGGGGACGGTATCATGAC <b>CT</b> GCGATCAGCTTTTCAAC               |
| BRR_S127 | GTTGAAAAGCTGATCGCA <b>GT</b> CATGATACCGTCCCCGA                |
| BRF_A128 | GGGACGGTATCATGAGTGT <b>GT</b> GATCAGCTTTTCAACGTC              |
| BRR_A128 | GACGTTGAAAAGCTGATC <b>AC</b> ACTCATGATACCGTCCC                |

\*Substituted nucleotides are indicated in bold.

**Supplementary Table 2.** Summary of kinetic data for wild-type and mutant cyanases from Non-linear curve-fitting using Michaelis-Menten plots

| Protein         | $k_{cat}$ (s <sup>-1</sup> ) | $K_m$ (mM) (for cyanate) | $k_{cat}/K_m$ (s <sup>-1</sup> M <sup>-1</sup> ) |
|-----------------|------------------------------|--------------------------|--------------------------------------------------|
| Wild-type       | $3.52 \times 10^4$           | 0.72 (from 95% CI)       | $4.88 \times 10^7$                               |
| Y14A            | $4.78 \times 10^4$           | 0.41 (from best-fit)     | $11.66 \times 10^7$                              |
| R101K           | NA <sup>a</sup>              | NA <sup>a</sup>          | NA <sup>a</sup>                                  |
| E104D           | $5.51 \times 10^3$           | 0.17 (from best-fit)     | $3.24 \times 10^7$                               |
| S127T           | NA <sup>a</sup>              | NA <sup>a</sup>          | NA <sup>a</sup>                                  |
| A128V           | $5.54 \times 10^3$           | 0.18 (from best-fit)     | $3.08 \times 10^7$                               |
| A128V/<br>R101K | NA <sup>a</sup>              | NA <sup>a</sup>          | NA <sup>a</sup>                                  |

<sup>a</sup>No activity was observed under the same conditions.
